# Supplementary material for: Emotional Valence, Arousal, and Threat Ratings of 160 Chinese Words among Adolescents
Source: PLoS One. 2015 Jul 30;10(7):e0132294. doi: 10.1371/journal.pone.0132294 (PMC4520557; doi:10.1371/journal.pone.0132294)
Supplement: S1 Table — (XLSX) [file pone.0132294.s001.xlsx]

## Sheet: Sheet1
Word No.	Chinese Word	English Translation	Type	Valence (rating = 1-9)	Arousal (rating = 1-9)	Threat (rating = 1-5)
				Mean (SD)	Mean (SD)	Mean (SD)
1	宣傳	Advertise	Neutral	5.91 (2.28)	4.25 (2.49)	1.92 (1.19)
2	孤獨	Alone	Negative	3.07 (2.18)	4.00 (2.45)	2.16 (1.18)
3	煩惱	Annoyed	Negative	2.55 (2.04)	5.54 (2.29)	3.06 (1.39)
4	羞恥	Ashamed	Negative	2.39 (1.74)	5.08 (2.51)	2.48 (1.25)
5	毆打	Assault	Negative	2.47 (1.87)	5.53 (2.74)	3.36 (1.45)
6	閣樓	Attic	Neutral	5.10 (1.45)	3.41 (2.28)	1.85 (1.18)
7	逃避	Avoid	Negative	3.35 (2.31)	4.24 (2.15)	1.74 (0.94)
8	笨拙	Awkward	Negative	2.51 (1.92)	4.48 (2.42)	2.61 (1.38)
9	欄杆	Banister	Neutral	4.72 (2.08)	3.57 (2.22)	2.32 (1.36)
10	地庫	Basement	Neutral	4.92 (1.86)	3.56 (2.25)	2.26 (1.31)
11	痛打	Beating	Negative	2.65 (2.02)	5.69 (2.59)	3.36 (1.34)
12	睡房	Bedroom	Neutral	4.54 (2.51)	4.69 (2.57)	1.76 (1.05)
13	毛毯	Blanket	Neutral	5.18 (2.03)	3.43 (2.00)	1.96 (1.22)
14	臉紅	Blushed	Negative	3.42 (2.34)	4.52 (2.40)	2.33 (1.45)
15	書架	Bookcase	Neutral	4.98 (2.19)	3.34 (2.37)	1.94 (1.28)
16	書本	Booklet	Neutral	4.63 (2.64)	4.06 (2.44)	1.57 (0.93)
17	磚塊	Bricks	Neutral	5.32 (2.64)	3.33 (2.34)	2.45 (1.35)
18	卓越	Brilliant	Positive	6.73 (2.08)	4.98 (2.90)	1.53 (0.95)
19	掃帚	Broom	Neutral	6.00 (2.65)	3.21 (2.33)	1.60 (0.87)
20	癌症	Cancer	Negative	2.27 (1.67)	5.82 (2.49)	3.57 (1.51)
21	地毯	Carpet	Neutral	4.75 (2.18)	2.76 (2.09)	1.68 (0.87)
22	迷人	Charming	Positive	6.42 (2.40)	3.88 (2.80)	1.57 (1.04)
23	煙囱	Chimney	Neutral	4.06 (2.31)	3.25 (2.33)	2.10 (1.32)
24	清潔	Clean	Neutral	5.78 (2.45)	2.83 (1.97)	1.71 (1.06)
25	時鐘	Clock	Neutral	5.00 (1.99)	3.31 (2.32)	1.76 (1.19)
26	衣櫃	Closet	Neutral	4.00 (1.96)	3.41 (2.25)	2.20 (1.31)
27	抹布	Cloth	Neutral	5.15 (2.56)	3.38 (2.51)	1.60 (0.92)
28	倒塌	Collapse	Negative	3.55 (2.16)	4.94 (3.00)	3.02 (1.61)
29	舒服	Comfort	Positive	6.66 (2.39)	3.52 (2.42)	1.29 (0.62)
30	自信	Confident	Positive	6.37 (2.10)	3.77 (2.72)	1.82 (1.00)
31	包含	Contain	Neutral	5.17 (2.10)	3.77 (2.54)	1.87 (1.25)
32	滿足	Contented	Positive	6.07 (2.29)	4.17 (2.93)	1.67 (0.93)
33	烹調	Cook	Neutral	4.42 (2.68)	4.42 (2.67)	2.39 (1.34)
34	飯煲	Cooker	Neutral	4.27 (2.42)	4.15 (2.46)	2.24 (1.31)
35	沙發	Couch	Neutral	4.37 (2.41)	4.44 (2.66)	2.46 (1.49)
36	蓋子	Cover	Neutral	5.74 (2.43)	4.02 (2.42)	1.55 (1.14)
37	懦夫	Coward	Negative	3.04 (2.17)	5.28 (2.59)	2.86 (1.17)
38	杯子	Cup	Neutral	5.23 (1.65)	3.33 (2.30)	1.82 (1.01)
39	櫥櫃	Cupboard	Neutral	5.00 (1.97)	3.78 (2.48)	1.80 (1.04)
40	高興	Delight	Positive	7.93 (1.77)	4.91 (2.70)	1.48 (0.90)
41	書桌	Desk	Neutral	4.82 (1.95)	3.41 (2.38)	2.04 (1.26)
42	絕望	Despair	Negative	3.17 (2.19)	4.40 (2.55)	2.48 (1.43)
43	鄙視	Despise	Negative	3.16 (2.25)	5.16 (2.49)	2.45 (1.21)
44	憎惡	Detested	Negative	3.84 (2.17)	3.88 (2.62)	2.73 (1.40)
45	疾病	Disease	Negative	3.60 (2.33)	4.06 (2.75)	2.86 (1.47)
46	碗碟	Dishes	Neutral	5.50 (2.64)	4.04 (2.62)	1.81 (1.23)
47	頭暈	Dizzy	Negative	2.58 (1.56)	4.00 (2.19)	2.36 (1.22)
48	門鈴	Doorbell	Neutral	5.26 (1.75)	3.82 (2.32)	1.84 (1.22)
49	門把	Doorknob	Neutral	4.16 (2.10)	4.34 (2.53)	2.43 (1.40)
50	抽屜	Drawers	Neutral	6.00 (1.95)	4.04 (2.33)	1.72 (1.09)
51	垂死	Dying	Negative	2.50 (1.84)	5.48 (2.63)	4.00 (1.23)
52	尷尬	Embarrass	Negative	2.94 (1.70)	5.47 (2.69)	2.13 (1.20)
53	緊急	Emergencies	Negative	3.15 (1.88)	4.69 (2.94)	3.35 (1.65)
54	熱心	Enthusiastic	Positive	7.04 (2.33)	4.26 (2.36)	1.65 (1.14)
55	風扇	Fan	Neutral	5.69 (2.13)	3.75 (2.29)	2.21 (1.14)
56	過錯	Fault	Negative	3.15 (2.22)	4.85 (2.48)	2.37 (1.17)
57	指尖	Fingertips	Neutral	5.83 (2.43)	4.02 (2.71)	1.64 (1.10)
58	火光	Firelight	Neutral	5.04 (1.97)	4.06 (2.90)	2.37 (1.25)
59	幸運	Fortunate	Positive	6.13 (2.37)	4.36 (2.63)	1.59 (0.94)
60	自由	Freedom	Positive	7.65 (1.96)	4.69 (2.89)	1.49 (0.77)
61	恐怖	Fright	Negative	2.42 (2.05)	4.78 (2.70)	2.86 (1.41)
62	有趣	Fun	Positive	6.67 (2.39)	3.23 (2.23)	1.30 (0.81)
63	裝修	Furnished	Neutral	5.72 (2.44)	4.29 (2.47)	1.82 (1.26)
64	傢俱	Furniture	Neutral	5.10 (2.09)	3.40 (2.32)	1.88 (1.22)
65	車房	Garage	Neutral	4.96 (1.87)	3.47 (2.34)	2.00 (1.12)
66	氣體	Gas	Neutral	4.10 (2.17)	3.22 (2.07)	1.84 (0.98)
67	慷慨	Generous	Positive	6.47 (2.21)	4.10 (2.53)	1.41 (0.91)
68	雜貨	Groceries	Neutral	4.13 (2.27)	4.10 (2.40)	2.58 (1.55)
69	髮刷	Hairbrush	Neutral	4.55 (1.87)	3.48 (2.02)	1.92 (1.32)
70	危險	Hazard	Negative	3.82 (1.82)	5.30 (2.70)	3.20 (1.53)
71	健康	Healthy	Positive	6.40 (2.37)	3.75 (2.41)	1.71 (1.14)
72	暖爐	Heater	Neutral	5.93 (2.42)	3.66 (2.43)	1.82 (1.21)
73	暖氣	Heating	Neutral	4.11 (2.51)	4.42 (2.41)	2.41 (1.51)
74	無助	Helpless	Negative	3.52 (2.10)	3.80 (2.42)	2.27 (1.22)
75	英勇	Heroic	Positive	6.63 (2.23)	4.75 (2.47)	1.61 (0.96)
76	掛鈎	Hook	Neutral	5.30 (2.19)	4.31 (2.75)	2.15 (1.32)
77	驚駭	Horror	Negative	2.69 (1.75)	5.50 (2.54)	3.13 (1.48)
78	房屋	House	Neutral	4.12 (2.64)	4.33 (2.60)	2.73 (1.67)
79	家庭	Household	Neutral	4.79 (2.74)	4.23 (2.46)	2.12 (1.18)
80	家務	Housework	Neutral	4.55 (1.92)	3.69 (2.54)	1.82 (1.07)
81	白痴	Idiotic	Negative	2.48 (1.90)	4.85 (2.40)	3.34 (1.61)
82	執行	Implements	Neutral	5.81 (2.12)	3.53 (2.45)	1.71 (0.94)
83	保險	Insurance	Neutral	4.66 (2.11)	3.46 (2.28)	1.84 (1.17)
84	喜悅	Joy	Positive	6.77 (2.22)	4.46 (2.36)	1.39 (0.61)
85	鑰匙	Keys	Neutral	5.37 (1.76)	3.88 (2.58)	2.00 (1.30)
86	廚房	Kitchen	Neutral	4.24 (2.31)	4.12 (2.82)	2.91 (1.64)
87	電燈	Lamp	Neutral	4.30 (2.52)	3.83 (2.32)	2.47 (1.47)
88	着陸	Landing	Neutral	5.28 (2.19)	3.90 (2.59)	1.73 (0.98)
89	廁所	Lavatory	Neutral	4.83 (2.18)	3.58 (2.71)	1.94 (1.17)
90	懶惰	Lazy	Negative	3.44 (1.98)	3.73 (2.53)	2.04 (1.31)
91	燈泡	Lightbulb	Neutral	5.73 (2.48)	3.52 (2.43)	1.73 (1.08)
92	可愛	Lovely	Positive	6.11 (2.29)	4.45 (2.77)	2.04 (1.23)
93	郵箱	Mailbox	Neutral	4.95 (2.28)	3.44 (2.53)	1.73 (1.06)
94	歡樂	Merriment	Positive	6.85 (2.19)	3.79 (2.45)	1.49 (0.86)
95	金屬	Metals	Neutral	4.33 (1.84)	3.76 (2.35)	2.28 (1.25)
96	奇跡	Miracles	Positive	6.26 (2.38)	4.84 (2.66)	1.96 (1.19)
97	中等	Moderate	Neutral	4.15 (2.30)	4.28 (2.20)	2.50 (1.35)
98	擦乾	Mopped	Neutral	4.48 (1.99)	3.47 (2.08)	1.57 (0.90)
99	鄰居	Neighbor	Neutral	4.07 (2.51)	4.39 (2.60)	2.59 (1.51)
100	報紙	Newspaper	Neutral	5.37 (2.34)	3.51 (2.22)	1.49 (0.89)
101	佔用	Occupy	Neutral	4.67 (2.03)	3.68 (2.41)	1.94 (1.23)
102	烤箱	Oven	Neutral	4.00 (2.50)	4.75 (2.77)	2.63 (1.51)
103	心慌	Palpitation	Negative	3.96 (2.28)	4.33 (2.51)	2.20 (1.21)
104	煎鍋	Pan	Neutral	4.48 (2.18)	3.09 (2.07)	2.06 (1.21)
105	樂園	Paradise	Positive	6.37 (2.20)	4.49 (2.44)	1.56 (0.97)
106	癱瘓	Paralyzed	Negative	3.74 (2.34)	4.31 (3.03)	2.83 (1.49)
107	農民	Peasants	Neutral	5.09 (2.22)	3.35 (2.39)	1.68 (1.12)
108	木釘	Pegs	Neutral	4.43 (2.19)	4.08 (2.35)	2.37 (1.39)
109	照片	Photo	Neutral	4.23 (2.65)	3.96 (2.43)	2.33 (1.45)
110	圖畫	Picture	Neutral	5.60 (2.44)	3.64 (2.57)	1.70 (1.06)
111	枕頭	Pillow	Neutral	5.52 (1.88)	3.12 (2.32)	1.84 (1.12)
112	管道	Pipe	Neutral	4.94 (1.80)	3.57 (2.34)	1.98 (1.14)
113	可憐	Pity	Negative	2.92 (2.08)	4.96 (2.37)	1.96 (1.15)
114	植物	Plants	Neutral	5.98 (2.51)	4.38 (2.59)	1.80 (1.09)
115	插頭	Plug	Neutral	5.71 (2.18)	4.20 (2.76)	1.96 (1.35)
116	磨光	Polished	Neutral	5.45 (2.84)	3.35 (2.08)	1.70 (1.08)
117	海報	Poster	Neutral	4.33 (1.93)	4.11 (2.65)	2.23 (1.34)
118	猛擊	Pounding	Negative	3.29 (2.28)	5.14 (2.38)	3.50 (1.30)
119	讚美	Praise	Positive	6.65 (2.19)	3.98 (2.68)	1.34 (0.60)
120	讚揚	Praised	Positive	6.25 (2.08)	4.14 (2.45)	1.56 (0.89)
121	威風	Prestigious	Positive	6.17 (2.08)	4.20 (2.43)	1.78 (1.11)
122	雪櫃	Refrigerator	Neutral	5.33 (2.17)	3.45 (2.30)	2.09 (1.21)
123	拒絕	Reject	Negative	2.91 (2.18)	5.13 (2.41)	2.58 (1.46)
124	報導	Reported	Neutral	4.62 (1.84)	3.59 (2.38)	1.80 (0.88)
125	搖椅	Rocker	Neutral	5.04 (2.27)	4.38 (2.52)	1.73 (1.06)
126	安全	Secure	Positive	6.09 (2.21)	4.08 (2.44)	1.58 (0.92)
127	牀單	Sheets	Neutral	4.40 (1.44)	2.86 (2.56)	1.71 (1.05)
128	真誠	Sincere	Positive	7.04 (2.03)	4.13 (2.57)	1.34 (0.69)
129	雪鞋	Snowshoe	Neutral	5.14 (2.25)	3.82 (2.44)	1.91 (1.16)
130	肥皂	Soap	Neutral	4.04 (1.66)	3.21 (2.48)	1.80 (1.01)
131	體育	Sports	Neutral	5.63 (2.12)	4.22 (2.55)	2.14 (1.29)
132	樓梯	Stairs	Neutral	5.09 (2.25)	3.98 (2.42)	2.04 (1.23)
133	矮櫈	Stool	Neutral	5.42 (1.79)	3.90 (2.62)	1.78 (1.12)
134	爐頭	Stove	Neutral	4.45 (2.04)	3.73 (2.42)	2.33 (1.35)
135	愚蠢	Stupid	Negative	2.24 (1.45)	5.22 (2.51)	2.27 (1.20)
136	成功	Successful	Positive	7.24 (2.17)	4.90 (2.82)	1.60 (1.01)
137	痛苦	Suffering	Negative	3.62 (2.21)	4.25 (2.69)	2.34 (1.26)
138	窒息	Suffocate	Negative	2.84 (1.84)	5.54 (2.72)	3.84 (1.36)
139	表面	Surface	Neutral	4.04 (2.01)	3.73 (2.35)	1.98 (1.42)
140	手術	Surgery	Negative	2.54 (2.04)	6.00 (2.61)	3.90 (1.33)
141	開關	Switch	Neutral	4.87 (2.53)	3.40 (2.27)	2.02 (1.22)
142	桌子	Table	Neutral	4.68 (1.68)	3.20 (2.12)	1.96 (1.18)
143	茶壺	Teapot	Neutral	5.85 (2.22)	3.77 (2.57)	1.69 (1.12)
144	取笑	Teased	Negative	3.15 (2.30)	4.72 (2.69)	3.08 (1.54)
145	電話	Telephone	Neutral	4.87 (2.74)	4.33 (2.46)	2.35 (1.26)
146	電視	Television	Neutral	5.67 (2.41)	3.67 (2.44)	1.48 (0.81)
147	優秀	Terrific	Positive	6.19 (2.47)	5.64 (2.60)	1.76 (1.05)
148	恐懼	Terrified	Negative	3.02 (2.33)	5.51 (2.74)	2.94 (1.45)
149	被困	Trapped	Negative	3.78 (2.31)	4.68 (2.67)	2.64 (1.43)
150	腫瘤	Tumor	Negative	3.96 (2.40)	4.69 (3.00)	2.94 (1.59)
151	刻薄	Unkind	Negative	2.76 (2.31)	4.18 (2.38)	2.32 (0.98)
152	樓上	Upstairs	Neutral	4.44 (2.06)	3.71 (2.57)	2.38 (1.64)
153	無能	Useless	Negative	2.74 (2.39)	4.69 (2.36)	2.79 (1.37)
154	真空	Vacuum	Neutral	5.10 (1.90)	3.52 (2.16)	1.96 (1.12)
155	暴力	Violence	Negative	3.13 (2.26)	5.32 (2.65)	3.06 (1.39)
156	窗戶	Windows	Neutral	4.48 (1.73)	2.96 (2.17)	1.78 (1.07)
157	翅膀	Wing	Neutral	5.43 (2.39)	3.80 (2.80)	2.10 (1.31)
158	擔心	Worried	Negative	2.93 (2.05)	5.08 (2.23)	2.88 (1.41)
159	傷口	Wound	Negative	3.07 (2.38)	4.71 (2.61)	2.92 (1.38)
160	錯誤	Wrong	Negative	2.88 (1.82)	4.78 (2.23)	2.33 (1.14)
